# Supplementary material for: Molecular Prevalence and Genetic Diversity Based on Msp1a Gene of Anaplasma ovis in Goats from Türkiye
Source: MDPI journal article supplement (doi:10.3390/life13051101), 2023-04-28
Supplement: s1 [file s1]

**Supplementary Table S1.** Nucleotide sequences of nested PCR primers and RLB probes used in the study.

| Primer                                  | Sequence (5'-3')                      | References |
|-----------------------------------------|---------------------------------------|------------|
| EC9                                     | TACCTTGTTACGACTT                      | [52]       |
| EC12A                                   | TGATCCTGGCTCAGAACGAACG                | [52]       |
| 16S8FE                                  | GGAATTCAGAGTTGGATCMTGGYTCAG           | [39]       |
| B-GA1B                                  | biotin-CGGGATCCCGAGTTTGCCGGGACTTCTTCT | [39]       |
| AoMsp1aF                                | CGTTTCCATGTGCTACAATGCCG               | [15]       |
| AoMsp1aR                                | GCTGTTC GCTATCGCAGTCTGTG              | [15]       |
|                                         |                                       |            |
| Probs                                   | Modification (5'-3')                  |            |
| <i>Anaplasma/Ehrlichia</i><br>catch-all | C6 amino-GGG GGA AAG ATT TAT CGC TA   | [39]       |
| <i>A. ovis</i>                          | C6 amino-ACC GTA CGC GCA GCT TG       | [39]       |

**Supplementary Table S2.** The Msp1a amino acid repeat sequences of *A. ovis* different geographical strains identified from sheep and goat.

| Repeat form | Encoded sequence                                | aa | Geographical location | References |
|-------------|-------------------------------------------------|----|-----------------------|------------|
| Ao1         | GQVSPSEHSSSSAVMDTSWSTFSGAATSWTSSGVATPGEQSSNQAS  | 46 | China                 | [15]       |
| Ao2         | GQVSPSEHSSSSAVMDTSWSTFSGAATSWSTFSGAATPGEQSSNQAS | 47 |                       |            |
| Ao3         | GQVSSSEHSSSSAVMDTSWSTFSGAATSWTSSGVATPGEQSSNQAS  | 46 |                       |            |
| Ao4         | GQVSSSEQGSSSAVMDTSWSTFSGAATSWSTFSGAATPGGQASNQAS | 47 |                       |            |
| Ao5         | GQVSPSEHSSSSAVMDTSWSTFSGAATSWTSSGAATPGEQSSNQAS  | 46 |                       |            |
| Ao6         | GQVSSSAVMDTSWSTFSGAATSWSTFSGAATPGGQAS           | 37 |                       |            |
| Ao7         | GQVSSSEQGSSSAVMDTSWSTFSGAATSWTSSGVATPGGQAS      | 42 |                       |            |
| Ao8         | GQVSSSEQGSSSDVMDTSWSTFSGAATSWSTFSGAATPGGQAS     | 43 |                       |            |
| Ao9         | GQVSSSEHSSSSAVMDTSWSTFSGAATSWSTFSGAATPGGQAS     | 43 |                       |            |
| Ao10        | GQVSSSEQGSSSAVMDTSWSTFSGAATSWSTFSGAATPGGQAS     | 43 |                       |            |
| Ao11        | GQVSSSAVMDTSWSTFSGAATSWTSSGVATPGGQAS            | 36 |                       |            |
| Ao12        | GQVSSSEQGSSSDVMDTSWSTFSGAATSWSTFSGAATPGGQAS     | 43 |                       |            |
| Ao13        | GQVSSSEQGSSSYVMDTSWSTFSGAATSWSTFSGVATPGGQAS     | 43 |                       |            |
| Ao14        | GQVSSSEQGSSSDVMDTSWSTFSGAATSWSTFSGVATPGGQAS     | 43 |                       |            |
| Ao15        | GQVSSSEQGSSSYVMDTSWSTLGAATPGGQAS                | 33 |                       |            |
| Ao16        | GQVSSSEQGSSPDVMDTSWSTFSGAATPGGQAS               | 33 |                       |            |
| Ao17        | GQVSPSEHSSSSAVMDTSWSTFSGAATSWTSSGVATPGGQAS      | 42 |                       |            |
| Ao18        | GQVSSSEQGSSSDVMDTSWSTFSGAATPGGQAS               | 33 |                       |            |
| Ao19        | GQVSSSEQGSSSAVMDTSWSTFSGAATPGGQAS               | 33 |                       |            |
| Ao20        | GQVSSSEQGSSSYVMDTSWSTFSGAATSWTSSGVATPGGQAS      | 42 |                       |            |
| Ao21        | GQVSSSDVMDTSWSTFSGAATSWSTFSGAATPGGQAS           | 37 |                       |            |
| Ao22        | GQVSSSEQGSSSDVMDTSWSTFSGAATPGEQSSNQAS           | 37 |                       |            |
| Ao23        | GQVSPSEHSSSSAVMDTSWSTSSGAATPGEQSSNQAS           | 36 |                       |            |
| Ao24        | GQVSPSEHSSSSAVMDTSWSTFSGAATPGEQSSNQAS           | 37 |                       |            |
| AoTr1       | VQVSSSEQGSSSNVMDTSQSTFSGAATPGGQAS               | 33 | Türkiye               | [7]        |
| AoTr2       | GQVSSSEQGSSSYVMDTSWSTFSGAATPGGQAS               | 33 |                       |            |
| AoTr3       | GQVSSSGHSSSAVMDTSWSTFSGAATPGEQSS                | 33 |                       |            |
| AoTr4       | GQVSSSEQGSSSDVMDTSWSTFSGAATSWSAFSGAATPGGQAS     | 43 |                       |            |
| AoTr5       | GQVSSSEQGSSSDVMDTSWSTFSGAATSWTSGAATPGGQAS       | 42 |                       |            |
| AoTr6       | GQVSSSEQGSPSDVMDTSWSTFSGAATSWTSSGVATPGGQAS      | 42 |                       |            |
| AoTr7       | VQVSSSEQGSSSYVMDTSWSTFSGAATPGGQAS               | 33 |                       |            |
| AoTr8       | GQVSPSEHSSSDVMDTSWSTFSGAATPGGQAS                | 33 |                       |            |
| AoTr9       | GQVSSSEQGSSSNVMDTSWSTFSGAATPGGQAS               | 33 |                       |            |
| AoTr10      | GQVSSSEQGSSSDVMDTSWSTFSGAATSWTSCGAATPGGQAS      | 42 |                       |            |
| AoTr11      | GQVSSSEQGSSSDVMDTSWSTFSGAATSWTSGAATPGVQAS       | 42 |                       |            |
| AoTr12      | GQVSSSEQGSSSDVMDTSWSTLGAATPGGQAS                | 33 |                       |            |
| AoTr13      | GQVSSSEQGSSSYVMDTSWSTFSGAATPGGFSGAATPGGQAS      | 42 |                       |            |
| AoTr14      | GQVSSSEQGSSSDVMDTSWSTFSGAATPGGFSGAATPGGQAS      | 42 |                       |            |
| AoTn1       | DQVSSSEQVSSSEQGSSSDVMDTSWSTFSGAATSWTSGAATPGGQAS | 48 | Tunisia               | [33]       |
| AoTn2       | DQVSSSGQVSSSEQGSSSDVMDTSWSTFSGAATSWTSGAATPGGQAS | 48 |                       |            |
| AoTn3-5     | DQVSSSGQVSSSEQGSSSDVMDTSWSTFSGAATSWTSGAATPGGQAS | 49 |                       |            |
| AoTn4-12-14 | DQVSSSEQGSSSDVMDTSWSTFSGAATSWTSGAATPGGQAS       | 42 |                       |            |
| AoTn3-5     | DQVSSSGQVSSSEQGSSSDVMDTSWSTFSGAATSWTSGAATPGGQAS | 49 |                       |            |
| AoTn6       | DQVSSSGQVSPSEHSSSAVMDTSWRTFSGAATSWTSGAATPGGQAS  | 49 |                       |            |
| AoTn7       | DQVSSSGQVSSSEHSSSDVMDTSWSTFSGAATSWTSGAATPGGQAS  | 49 |                       |            |
| AoTn8       | DQVSSSEQGSSSDVMDTSWSTFSGAATSWTSGAATPGGQAS       | 43 |                       |            |
| AoTn9       | DQVSSSDQVSSSEQGSSSDVMDTSWSTFSGAATSWTSGAATPGGQAS | 48 |                       |            |
| AoTn10      | DQVSSSEQGSSSDVMDTSWSTFSGAATSWTSSGAATPGGQAS      | 42 |                       |            |
| AoTn11      | DQVSSSGQVSSSEQGSSSDVMDTSWSTFSGAATSWTSGAATPGGQTS | 49 |                       |            |
| AoTn4-12-14 | DQVSSSEQGSSSDVMDTSWSTFSGAATSWTSGAATPGGQAS       | 42 |                       |            |

|             |                                                 |    |
|-------------|-------------------------------------------------|----|
| AoTn13      | DQVSSSEQVSSSEVGDSSGSTFGGAATSWTSSGAATPGGQAS      | 42 |
| AoTn4-12-14 | DQVSSSEQSSSDVMDTSWSTFSGAATSWTFSGAATPGGQAS       | 42 |
| AoTn15      | DQVSSSEQVSSSEQSSSDVMETSWSTSSGAATSWTFSGAATPGGQAS | 49 |
| AoTn16      | DQVISSQQGSSSHVMDTSRSTFTGAATSWTSSGAPTPRGQAS      | 42 |
| AoTn17      | GQVSSSEQSSSDVVDTSQSTFSGAATPGGQAS                | 33 |
| AoTn18      | GQVSSSGQVSSSEQSSSDVMDTSWTLGAATPGGQAS            | 38 |
| AoCg1/AoTr2 | GQVSSSEQSSSYVMDTSWSTFSGAATPGGQAS                | 33 |
| AoCg2       | GQVSSSGQVSSSEQSSSYVMDTSWSTFSGAATPGGQAS          | 39 |

---
